# Supplementary material for: Network analysis of the relationship between self-injury addiction, attachment, and anxiety in adolescents with non-suicidal self-injury
Source: Research Square preprint supplement (doi:10.21203/rs.3.rs-6664751/v1), 2025-05-26
Supplement: Supplementary file 1 [file bd3392da7a956d3a791eace4.docx]

**Supplemental materials**

**Figure legends**

**Figure S1.** Bootstrapped test for confidence intervals of EI and bridge EI of NSSI Addiction network model

**Figure S2.** Bootstrapped difference test for edge weight of NSSI Addiction network model

**Figure S3.** Bootstrapped difference test for expected influence of NSSI Addiction network model

**Table S1.** Basic information and network inference of items used to self harm addiction, anxiety and attachment (N=1,169)

| Nodes | Label | **EI** | **BEI** |
| --- | --- | --- | --- |
| **OSI-A** | | | |
| self harm addiction | A | 0.36 | 2.44 |
| **IPPA** | | | |
| Father trust | Father1 | -1.03 | -1.05 |
| Father communication | Father2 | -0.96 | -0.62 |
| Father alienation | Father3 | -1.00 | 0.18 |
| Mother trust | Mother1 | -0.39 | -0.63 |
| Mother communication | Mother2 | -0.39 | -0.75 |
| Mother alienation | Mother3 | -1.46 | -0.28 |
| Peer trust | Peer1 | -0.45 | -1.25 |
| Peer communication | Peer2 | -0.09 | -0.39 |
| Peer alienation | Peer3 | 0.22 | 1.19 |
| **MASC** | | | |
| physical symptoms | MASC1 | 0.94 | 0.94 |
| harm avoidance | MASC2 | 1.87 | 0.62 |
| social anxiety | MASC3 | 1.25 | -0.25 |
| separation anxiety | MASC4 | 1.13 | -0.14 |

**Table S2.** Weighted adjacency matrix of the attachment and anxiety with self harm addiction network model

|  | **A** | **Father1** | **Father2** | **Father3** | **Mother1** | **Mother2** | **Mother3** | **Peer1** | **Peer2** | **Peer3** | **TMASC1** | **TMASC2** | **TMASC3** | **TMASC4** |
| --- | --- | --- | --- | --- | --- | --- | --- | --- | --- | --- | --- | --- | --- | --- |
| **A** | 0.00 |  |  |  |  |  |  |  |  |  |  |  |  |  |
| **Father1** | -0.01 | 0.00 |  |  |  |  |  |  |  |  |  |  |  |  |
| **Father2** | 0.00 | 0.72 | 0.00 |  |  |  |  |  |  |  |  |  |  |  |
| **Father3** | 0.08 | -0.17 | -0.18 | 0.00 |  |  |  |  |  |  |  |  |  |  |
| **Mother1** | 0.00 | 0.26 | -0.13 | 0.03 | 0.00 |  |  |  |  |  |  |  |  |  |
| **Mother2** | -0.03 | -0.14 | 0.19 | 0.10 | 0.75 | 0.00 |  |  |  |  |  |  |  |  |
| **Mother3** | 0.03 | 0.03 | 0.08 | 0.31 | -0.15 | -0.24 | 0.00 |  |  |  |  |  |  |  |
| **Peer1** | -0.01 | 0.03 | 0.00 | 0.01 | 0.04 | 0.00 | 0.00 | 0.00 |  |  |  |  |  |  |
| **Peer2** | 0.04 | 0.00 | 0.01 | 0.01 | 0.00 | 0.03 | 0.06 | 0.86 | 0.00 |  |  |  |  |  |
| **Peer3** | 0.14 | 0.00 | 0.00 | 0.08 | 0.01 | 0.09 | 0.24 | -0.10 | 0.01 | 0.00 |  |  |  |  |
| **TMASC1** | 0.25 | 0.00 | -0.06 | 0.08 | -0.01 | -0.07 | 0.03 | 0.00 | 0.00 | 0.10 | 0.00 |  |  |  |
| **TMASC2** | 0.01 | 0.00 | 0.06 | 0.01 | 0.00 | 0.04 | 0.00 | 0.01 | 0.08 | 0.05 | 0.20 | 0.00 |  |  |
| **TMASC3** | 0.03 | 0.00 | -0.06 | 0.01 | 0.02 | 0.00 | 0.06 | 0.00 | -0.05 | 0.08 | 0.20 | 0.41 | 0.00 |  |
| **TMASC4** | 0.07 | -0.04 | 0.09 | 0.00 | 0.02 | 0.07 | -0.02 | -0.07 | 0.00 | 0.00 | 0.19 | 0.22 | 0.20 | 0.00 |

**Figure S1.** Bootstrapped test for confidence intervals of edge,EI and BEI of attachment and anxiety with self harm addiction network model


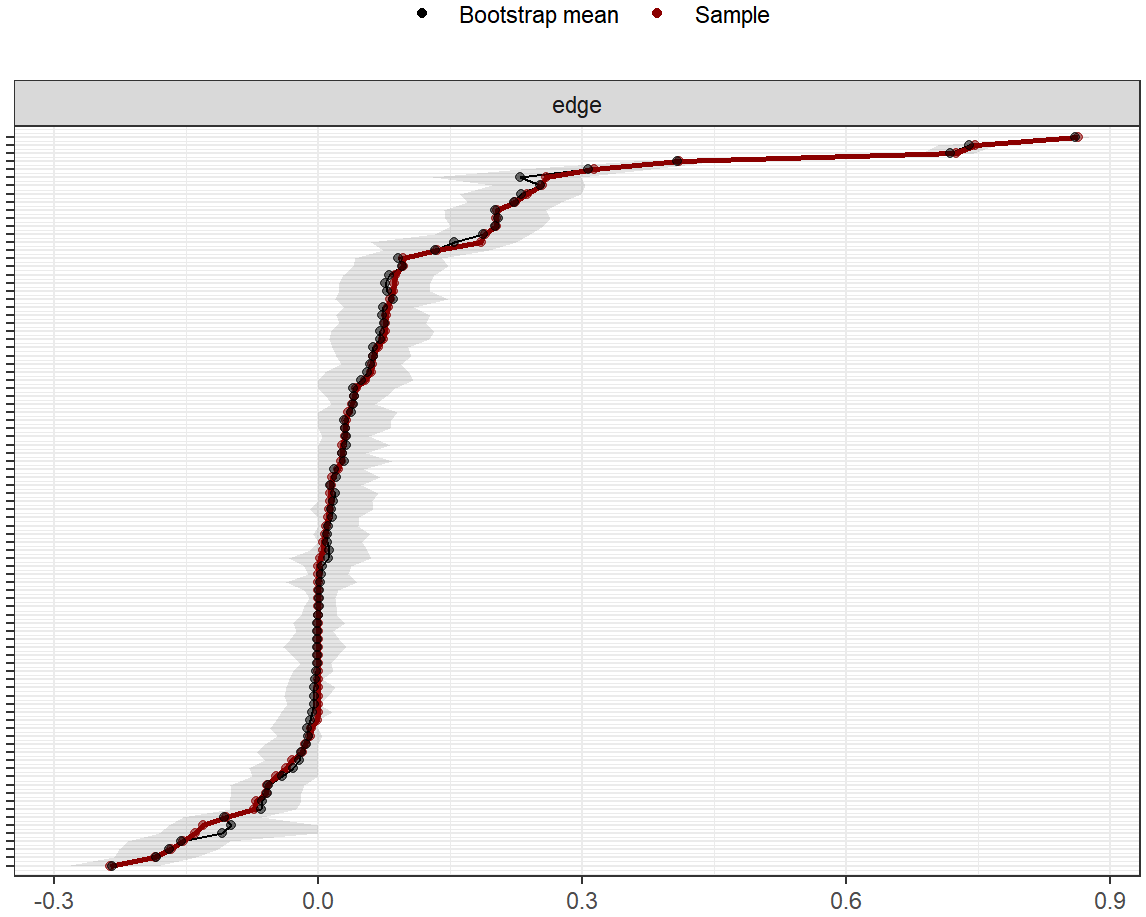


**Figure S2.** Bootstrapped difference test for edge weight of attachment and anxiety with self harm addiction network model


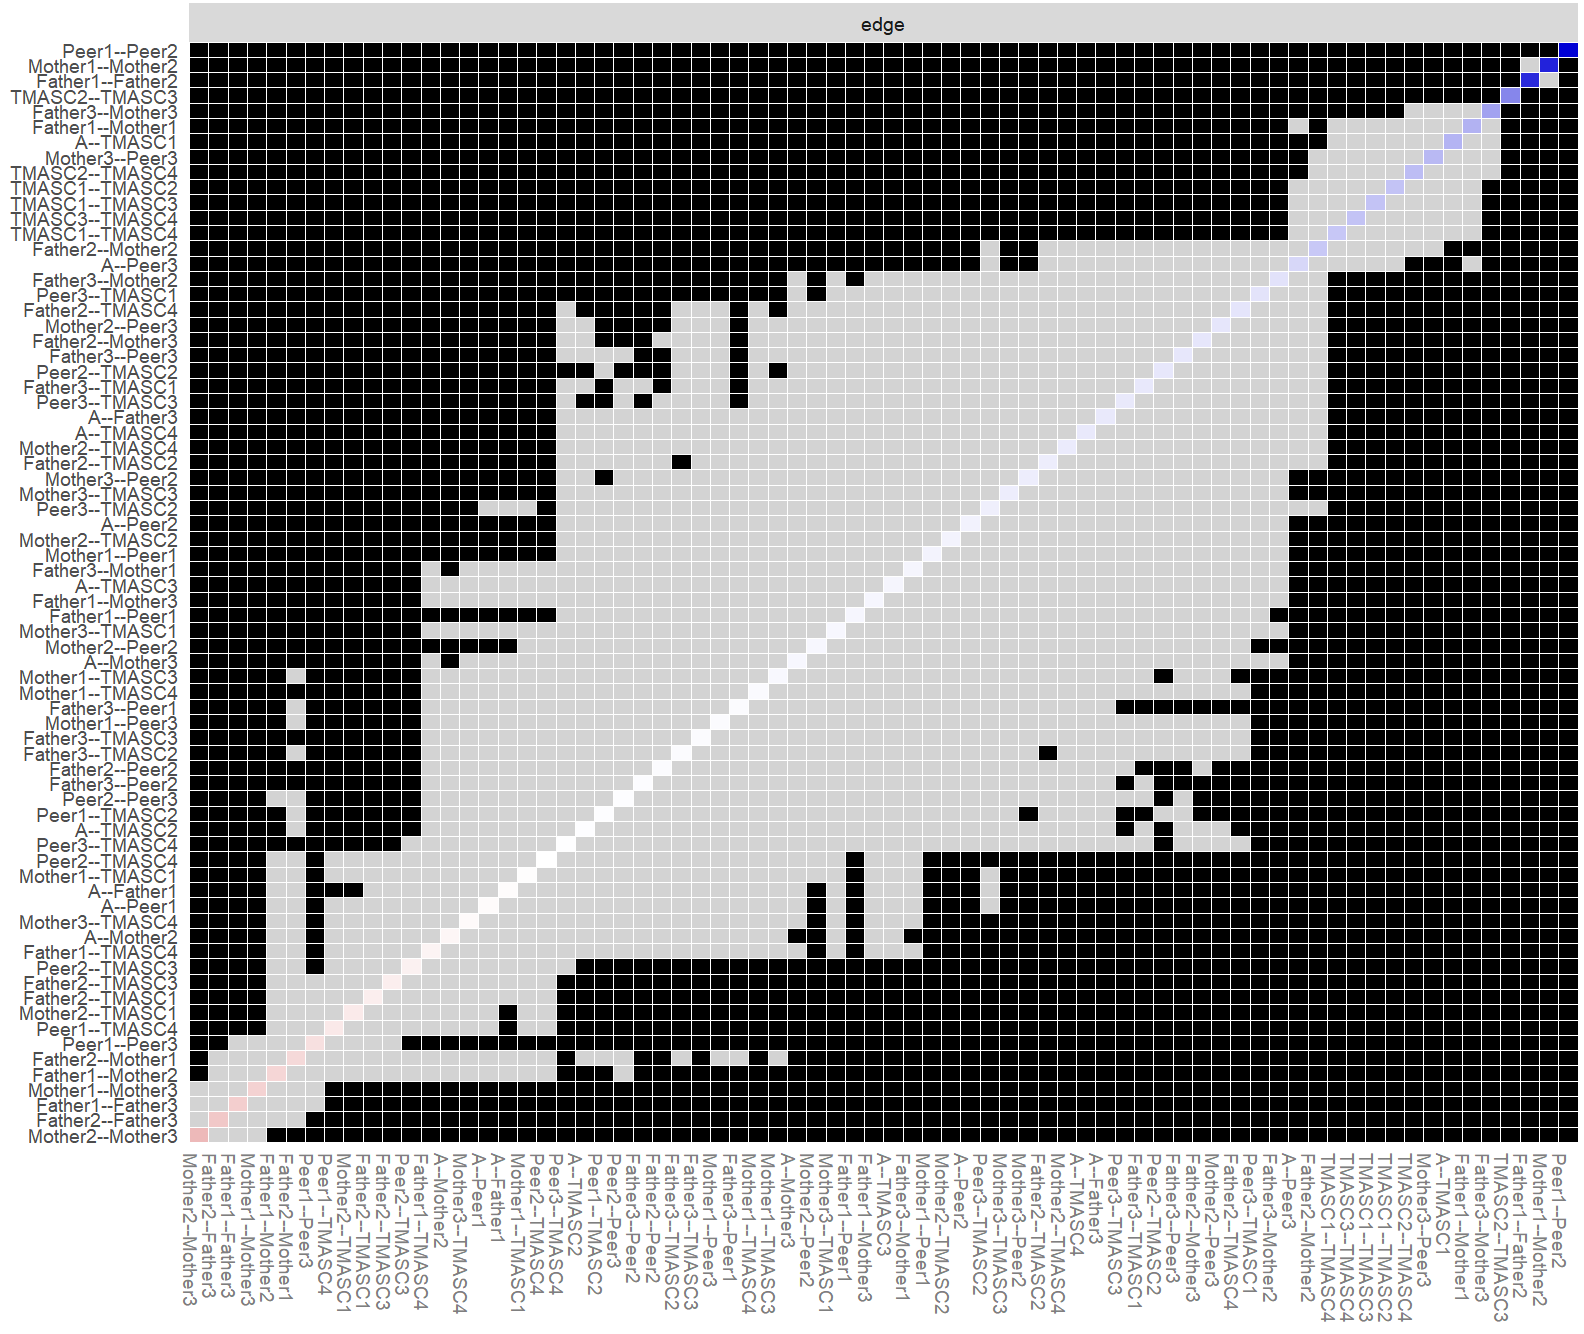


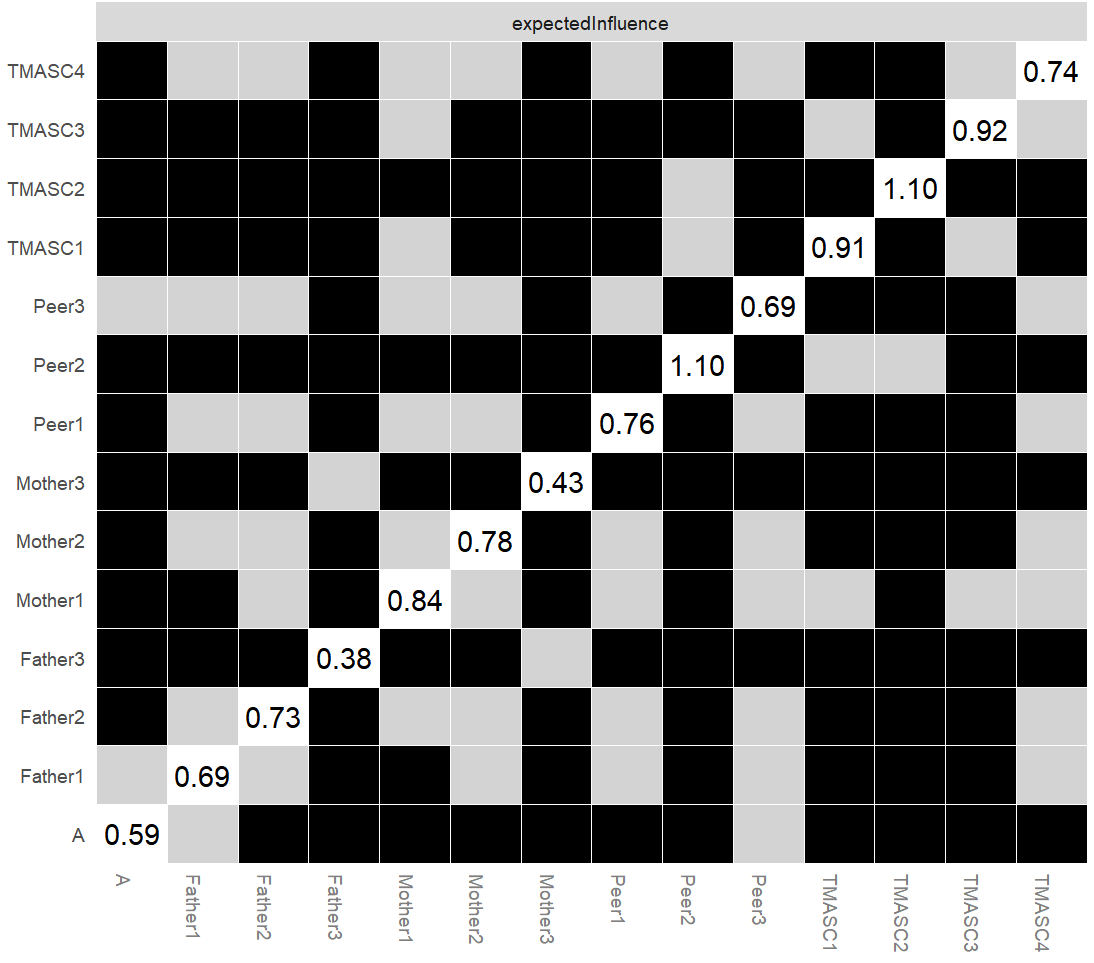
**Figure S3.** Bootstrapped difference test for expected influence of attachment and anxiety with self harm addiction network model
